# Supplementary material for: Cucurbitacin B-, E-, and I-Induced Browning of White Adipocytes Is Promoted by the Inhibition of Phospholipase D2
Source: MDPI journal article supplement (doi:10.3390/ijms232315362), 2022-12-06
Supplement: s1 [file s1]

Table S1. Chemical and physical properties of Cucurbitacin B, E and I.

|                                   | Cucurbitacin B                                 | Cucurbitacin E                                 | Cucurbitacin I                                 |
|-----------------------------------|------------------------------------------------|------------------------------------------------|------------------------------------------------|
| Molecular Weight                  | 558.7                                          | 556.7                                          | 514.6                                          |
| Molecular Formula                 | C <sub>32</sub> H <sub>46</sub> O <sub>8</sub> | C <sub>32</sub> H <sub>44</sub> O <sub>8</sub> | C <sub>30</sub> H <sub>42</sub> O <sub>7</sub> |
| XLogP3-AA                         | 2.6                                            | 3.2                                            | 2.7                                            |
| Hydrogen Bond Donor Count         | 3                                              | 3                                              | 4                                              |
| Hydrogen Bond Acceptor Count      | 8                                              | 8                                              | 7                                              |
| Rotatable Bond Count              | 6                                              | 6                                              | 4                                              |
| Exact Mass                        | 558.31926842                                   | 556.30361836                                   | 514.29305367                                   |
| Monoisotopic Mass                 | 558.31926842                                   | 556.30361836                                   | 514.29305367                                   |
| Topological Polar Surface Area    | 138                                            | 138                                            | 132                                            |
| Heavy Atom Count                  | 40                                             | 40                                             | 37                                             |
| Formal Charge                     | 0                                              | 0                                              | 0                                              |
| Complexity                        | 1210                                           | 1270                                           | 1160                                           |
| Isotope Atom Count                | 0                                              | 0                                              | 0                                              |
| Defined Atom Stereocenter Count   | 9                                              | 8                                              | 8                                              |
| Undefined Atom Stereocenter Count | 0                                              | 0                                              | 0                                              |
| Defined Bond Stereocenter Count   | 1                                              | 1                                              | 1                                              |
| Undefined Bond Stereocenter Count | 0                                              | 0                                              | 0                                              |
| Covalently-Bonded Unit Count      | 1                                              | 1                                              | 1                                              |
| Compound Is Canonicalized         | Yes                                            | Yes                                            | Yes                                            |
